# Modelling, Simulations and Analysis of the First and Second COVID-19 Epidemics in Beijing

Lequan Min

School of Mathematics and Physics

University of Science and Technology Beijing, Beijing, 100083, PR China

## Abstract

By 4 July, 2021 there were over 182 million people on infected with COVID-19. It caused more 3.9 million deaths. This paper introduces a symptomatic-asymptomatic-recoverer-dead differential equation model (SARDDE). It gives the conditions of the asymptotical stability on the disease-free equilibrium of SARDDE. It proposes the necessary conditions of disease spreading for the SARDDE. Based on the reported data of the first and the second COVID-19 epidemics in Beijing and simulations, it determines the parameters of SARDDE, respectively. Numerical simulations of SARDDE describe well the outcomes of current symptomatic and asymptomatic individuals, recovered symptomatic and asymptomatic individuals, and died individuals, respectively. The numerical simulations suggest that both symptomatic and asymptomatic individuals cause lesser asymptomatic spread than symptomatic spread; the blocking rates of about 90% and 97% to the symptomatic individuals cannot prevent the spread of the first and second COVID19 epidemics in Beijing, respectively. Virtual simulations suggest that the strict prevention and control strategies implemented by Beijing government are not only very effective but also completely necessary. The numerical simulations suggest also that using the data from the beginning to the days after about two weeks from the turning points can estimate approximately the following outcomes of the two COVID-19 academics, respectively. It is expected that the research can provide better understanding, explaining, and dominating for epidemic spreads, prevention and control measures.

**Keywords:** New coronavirus, SIR model, Disease-free equilibrium, Globally attractive, Simulations, Long-term's estimation.

## 1 Introduction

In December 2019, a novel coronavirus-induced pneumonia (COVID-19) broke out in Wuhan, Hubei. By 4 July, 2021 there were 182 million people on infected with COVID-19 worldwide. It caused more 3.9 million deaths. COVID-19 affects more than 220 countries and regions including Antarctica.

One of the reasons of such a tragedy is that people in some countries do not pay attentions to theoretical analysis and estimations for COVID-19 epidemics. In fact mathematical models for epidemic infectious diseases have played important roles in the formulation, evaluation, and prevention of control strategies. Modelling the dynamics of spread of disease can help people to understand the mechanism of epidemic diseases, formulate and evaluate prevention and control strategies, and predict tools for the spread or disappearance of an epidemic [1].

Since the outbreak of COVID-19 in Wuhan, many scholars have published a large numbers of articles on the modeling and prediction of COVID-19 epidemic (for examples see [2–9] ). It is difficult to describe well the dynamics of COVID-19 epidemics. In a Lloyd-Smith et al's paper, it described nine challenges in modelling the emergence of novel pathogens, emphasizing the interface between models and data [10].

On Jan. 19, two Beijingers returning from Wuhan were diagnosed with COVID-19. That triggered the first wave of COVID-19 in Beijing. During the first wave of COVID-19, a total of 420 locally diagnosed cases were reported. After 140 days , on June 8, 411 COVID-19 individuals were cured and 9 died. However three days later

there was one confirmed case of the COVID-19 in a new outbreak in Tongzhou district, Beijing. This triggered a second wave of the COVID-19. After 56 days, totals of 335 and 50 locally symptomatic and asymptomatic COVID-19 individuals were reported, and all individuals were cured. Medical staff have achieved zero infection [11].

This paper introduces a symptomatic-asymptomatic-recoverer-dead differential equation model (SARDDE). It gives the conditions of the asymptotical stability on the disease-free equilibrium of SARDDE. Using simulations determines the parameters of SARDDE based on the reported data of the two COVID-19 epidemics in Beijing [11]. Numerical simulations of SARDDE describe well the practical outcomes of current infected symptomatic and asymptomatic individuals, recovered infected symptomatic and asymptomatic individuals, and died infected individuals. Virtual simulations are given to estimate the effectiveness of the prevention and control strategies.

The rest of this paper is organized as follows. Section 2.1 establishes SARDDE. Section 2.2 provides the criterions of the asymptotical stability of the disease-free equilibrium. Section 2.3 determines the necessary conditions of disease spreading. Section 3.1 implements the dynamic simulations of SARDDE to describe the data of the first COVID-19 epidemic in Beijing; states analysis and discussions. In the same section two virtual simulation examples are implemented to emphasize the importance of strict control measures and long terms' estimation to epidemic spreading. Section 3.2.1 establishes a model without died case. Section 3.2.2 provides the criterions of the asymptotical stability of the disease-free equilibrium. Section 3.2.3 determines the necessary conditions of disease spreading. Section 3.2.4 implements the dynamic simulations of the model to describe the data of the second COVID-19 epidemic in Beijing; states analysis and discussions. In the same subsection, two virtual simulation examples are implemented. Conclusions are given in Section 4.

## 2 SARDDE Model and Dynamic Properties

### 2.1 SARDDE Model

For SARDDE model, there are four states.  $I(t), I_a(t), I_r(t), I_{ra}(t)$  and  $D(t)$  represent the fraction of current symptomatic infected individuals, and current asymptomatic but infected individuals, cumulative recovered symptomatic infected individuals, cumulative recovered asymptomatic but infected individuals and cumulative died individuals, respectively. The transition among these states is governed by the following rules (Flowchart of the rules is shown in Fig.1, where  $S$  represents susceptible population.).

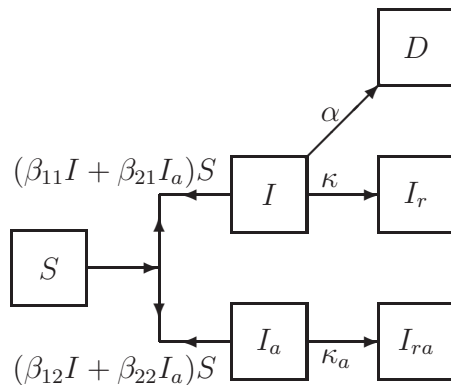

Figure 1: Flowchart of disease transmission among susceptible population  $S$ , current symptomatic infected individuals  $I$ , current asymptomatic but infected individuals  $I_a$ , recovered symptomatic infected individuals  $I_r$ , recovered asymptomatic but infected individuals  $I_{ra}$ , and died individuals  $D$ .

First, the symptomatic infected individuals ( $I$ ) and the asymptomatic but infected individuals ( $I_a$ ) infect the

susceptible population ( $S$ ) with the probabilities of  $\beta_{11}$  and  $\beta_{21}$ , respectively, making  $S$  become symptomatic infected individuals, and with the probabilities of  $\beta_{12}$  and  $\beta_{22}$ , respectively, making  $S$  become asymptomatic individuals. Then, a symptomatic individual is cured at a rate  $\kappa$ , an asymptomatic individual returns to normal at a rate  $\kappa_a$ . An infected individual dies at a rate  $\alpha$ . Here all parameters are positive numbers. Assume that the dynamics of an epidemic can be described by  $m$  time intervals. At  $i$ th interval, the model has the form:

$$\frac{dI}{dt} = \theta_1(i)(\beta_{11}I + \beta_{21}I_a)S - \kappa(i)I - \alpha(i)I \quad (1a)$$

$$\frac{dI_a}{dt} = \theta_2(i)(\beta_{12}I + \beta_{22}I_a)S - \kappa_a(i)I_a \quad (1b)$$

$$\frac{dI_r}{dt} = \kappa(i)I \quad (1c)$$

$$\frac{dI_{ra}}{dt} = \kappa_a(i)I_a \quad (1d)$$

$$\frac{dD}{dt} = \alpha(i)I \quad (1e)$$

where  $\theta_1(i)$ 's and  $\theta_2(i)$ 's ( $i = 1, \dots, m$ ) represent blocking rates to symptomatic and asymptomatic infections, respectively. Then system (1) has a disease-free equilibrium:

Then equation (1) has a disease-free equilibrium:

$$E = (0, 0, 0, 0, 0). \quad (2)$$

## 2.2 Stability of disease-free equilibrium

The stability of system (1) is determined by the first two equations (1a) and (1b). Denote in (1a) and (1b)

$$a_{11} = \theta_1(i)\beta_{11}S - \kappa(i) - \alpha(i) \quad (3)$$

$$, \quad a_{12} = \theta_1(i)\beta_{21}S, \quad (4)$$

$$a_{21} = \theta_2(i)\beta_{12}S, \quad (5)$$

$$a_{22} = \theta_2(i)\beta_{22}S - \kappa_a(i). \quad (6)$$

Then at the disease-free equilibrium of system(18), the Jacobian matrix of (18a) and (18b) is

$$J = \begin{bmatrix} a_{11} & a_{12} \\ a_{21} & a_{22} \end{bmatrix}$$

Solving the corresponding eigenequation obtains 2 eigenvalues:

$$x_{1,2} = \frac{1}{2} \left( a_{11} + a_{22} \pm \sqrt{(a_{11} + a_{22})^2 - 4(a_{11}a_{22} - a_{12}a_{21})} \right)$$

Therefore it obtains the following:

**Theorem 1** Suppose that  $a_{11}, a_{12}, a_{21}$  and  $a_{22}$  are defined by (3)-(6). Then the disease-free equilibrium  $E$  of system (1) is globally asymptotically stable if, and only if, the following inequalities hold:

$$(a) \quad R_{local}^1 \triangleq a_{11} + a_{22} < 0, \quad (7)$$

$$(b) \quad R_{local}^2 \triangleq a_{12}a_{21} - a_{11}a_{22} < 0. \quad (8)$$

## 2.3 The necessary condition of disease spreading

If an epidemic can occur, then

$$\dot{I}(t)|_{t=0} > 0, \quad \dot{I}_a(t)|_{t=0} > 0.$$

This implies that

$$\begin{aligned} \theta_1(i)(\beta_{11} + \beta_{21}I_a(t)/I(t))S - \alpha(i) - \kappa(i) &> 0 \\ \theta_2(i)(\beta_{12}I(t)/I_a(t) + \beta_{22})S - \kappa_a(i) &> 0. \end{aligned}$$

Solving the above inequalities gives the following

**Theorem 2** *If system (1) satisfies the following inequalities*

$$(a) \quad S_p^1 \triangleq \theta_1(i)(\beta_{11} + \beta_{21}I_a(t)/I(t))S/(\alpha(i) + \kappa(i)) > 1 \quad (9)$$

$$(b) \quad S_p^2 \triangleq \theta_2(i)(\beta_{12}I(t)/I_a(t) + \beta_{22})S/\kappa_a(i) > 1, \quad (10)$$

then a disease transmission will occur.

## 3 Applications

Based on the reported clinical COVID-19 epidemic data from January 19 to June 8, 2020 in Beijing [11], this Section will discuss the applications of the above theoretical results. Numerical simulations and drawings are performed by using MATLAB software programs. The first 50 days' reported clinical data on current confirmed infection cases, and the reported clinical data on recovered cases of the COVID-19 epidemic in Beijing [11] are shown in Figs. 2(a) and 2(b)<sup>1</sup>. The number of current symptomatic infected individuals is showed in Fig3(a) by circles. The numbers of cumulative recovered symptomatic infected individuals, and cumulative died infected individuals are showed in Fig3(b) by circles and stars respectively.

The number of current infected individuals was risen rapidly in the first 4 days (see Fig. 2(a)). The number of current infected individuals reached the highest 295 on the day 24th, February 12 and then after the day 31th, February 19, declined rapidly (see Fig. 2(a) and 3(a)).

Observe from the Figs. 3(a) and 3(b) that the overall changes in the number of current confirmed infections are not subject to the law of exponential changes, but the data can be approximated in good agreement with 8 straight lines in log scale (see Fig. 3). This phenomenon can be explained as: different medical measures prevention and control strategies have been adopted at the different 8 time intervals. On the day 86th, April 15, there are 3 Chaoyang district infected people coming back Beijing form foreign country which makes calculated blacking rates to rise. Therefore the  $i$  in SARDDE model (1) should be chosen as  $i = 1, 2, \dots, 8$ .

<sup>1</sup>In the cases that some reported data crossed one day, we assign approximately numbers according to the ratios of time intervals.

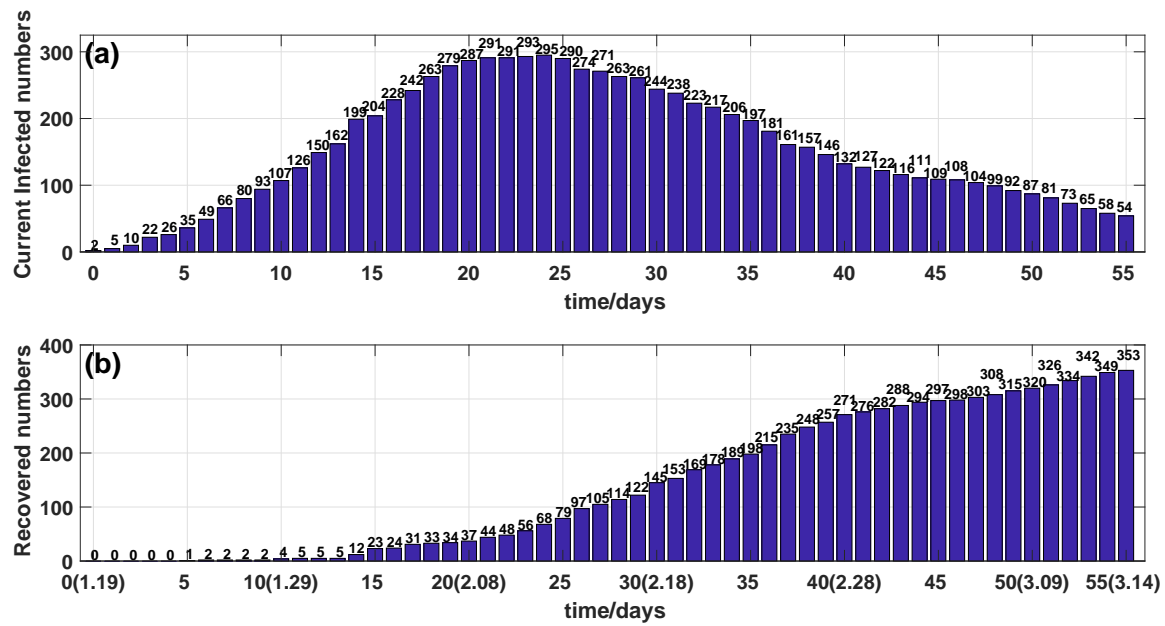

Figure 2: (a) Outcome of the number of current infected individuals. (b) Outcome of the number of cumulative recovered individuals.

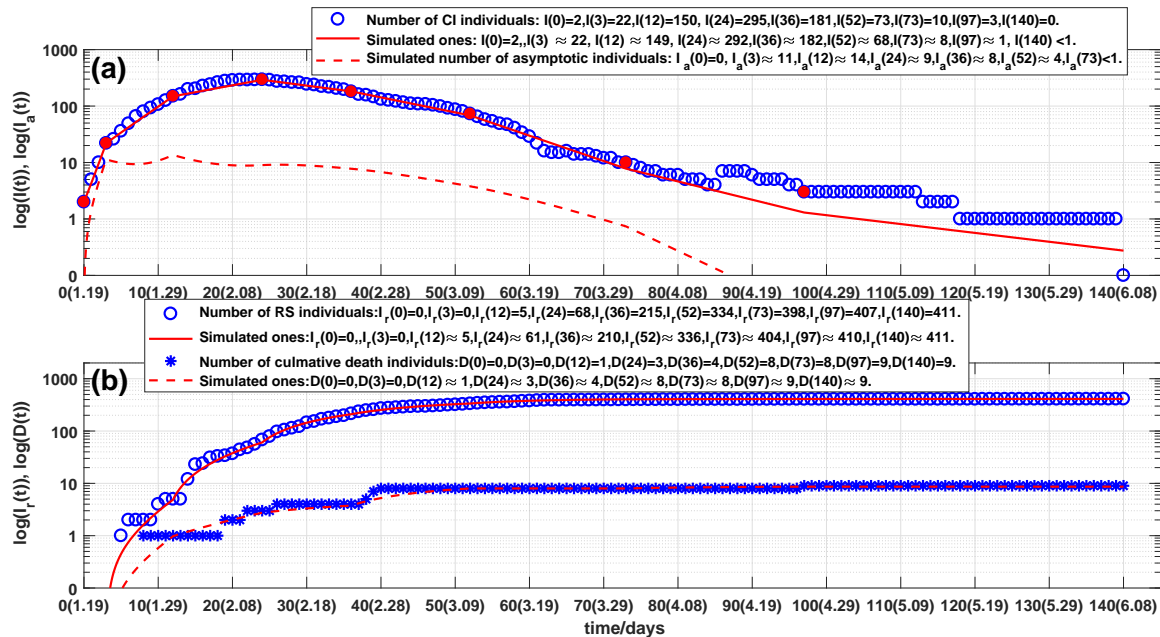

Figure 3: (a) Outcome of the number of current symptomatic individuals, representing by circles. Solid line and dash line are outcomes of stimulated current symptomatic individuals and stimulated current asymptomatic individuals of system (1). (b) Outcomes of the numbers of cumulative recovered symptomatic and died individuals, representing by circles and stars, respectively. Solid line and dash line are corresponding simulations of system (1).

**Table 1** The data of the first COVID-19 epidemic in Beijing on different days and corresponding calculated parameters of SARDDE. Where NCSII and NCDI represent the numbers [11] of current symptomatic infected individuals and current died individuals, respectively; NRSII the number [11] of recovered symptomatic infected individuals.

| $i$      | Day | Date | NCSII | NRSII | NCDII | $\kappa(i)$ | $\alpha(i)$ | $\theta_1(i)$ | $\theta_2(i)$ |
|----------|-----|------|-------|-------|-------|-------------|-------------|---------------|---------------|
| <b>1</b> | 0   | 1.19 | 2     |       | 0     |             |             |               |               |
|          | 3   | 1.22 | 22    | 0     | 0     | 0           | 0           | 1             | 1             |
| <b>2</b> | 4   | 1.23 | 26    | 5     | 0     | 0.0081301   | 0.001626    | 0.2855        | 0.052         |
|          | 12  | 1.31 | 150   |       | 1     |             |             |               |               |
| <b>3</b> | 13  | 2.01 | 162   | 63    | 1     | 0.02186     | 0.00069396  | 0.1035        | 0.01          |
|          | 24  | 2.12 | 293   |       | 3     |             |             |               |               |
| <b>4</b> | 25  | 2.13 | 295   | 147   | 3     | 0.053455    | 0.00036364  | 0.0191        | 0.01          |
|          | 36  | 2.24 | 181   |       | 4     |             |             |               |               |
| <b>5</b> | 37  | 2.25 | 161   | 119   | 4     | 0.067922    | 0.0022831   | 0.0118        | 0.01          |
|          | 52  | 3.11 | 73    |       | 8     |             |             |               |               |
| <b>6</b> | 53  | 3.12 | 65    | 64    | 8     | 0.11636     | 0           | 0.017         | 0.01          |
|          | 73  | 4.01 | 10    |       | 8     |             |             |               |               |
| <b>7</b> | 74  | 4.02 | 9     | 9     | 8     | 0.067164    | 0.0074627   | 0             | 0             |
|          | 97  | 4.26 | 3     |       | 9     |             |             |               |               |
| <b>8</b> | 98  | 4.27 | 3     | 3     | 9     | 0.036145    | 0           | 0             | 0             |
|          | 140 | 6.08 | 0     |       | 9     |             |             |               |               |

### 3.1 Simulation and prediction of the first COVID-19 epidemic in Beijing

First it needs to determine the parameters  $\kappa(i)$ ,  $\kappa_a(i)$  and  $\alpha(i)$ . There are different methods for calculating the recovery rate  $\kappa(i)$  in a specific time interval. It seems to be reasonable that we stands for  $\kappa(i)$  via using the number of the recovered patients to divide the days of patients stayed in the hospital during the  $i$ th time.

Denote  $s_1(i)$  and  $s_2(i)$  to be the days that the old patients and the new patients stayed in the hospital during  $i$ th time interval. Denote  $R(i)$  and  $d(i)$  to be the numbers of the recovered patients and died patients during  $i$ th time interval, respectively. Similar to the formulas given in Ref. [12],  $R(i)$  and  $d(i)$  can be defined by

$$\kappa(i) = \frac{R(i)}{s_1(i) + s_2(i)} \quad (11)$$

$$\alpha(i) = \frac{d(i)}{s_1(i) + s_2(i)}. \quad (12)$$

Since there is no information on recovered asymptomatic infected individuals, we take

$$\kappa_a(i) = \frac{1}{7}. \quad (13)$$

That is, an asymptomatic infected individual will recover in average 7 days. The calculated  $\kappa(i)$ 's and  $\alpha(i)$ 's are shown in the 7 ~ 8 columns in Table 1.

Second it needs to determine the parameters  $\beta'_{ij}$ 's in SARDDE. One can assume that  $S = 1$  because the effects of  $S$  can be deleted by calculated  $\beta'_{ij}$ 's. This makes the calculated  $\beta'_{ij}$ 's have general sense. Using the practical data of the first COVID-19 epidemic in Beijing [11] (also see the second row in Table 1) selects following initial condition:

$$(I(0), I_a(0), I_r(0), I_{ra}(0), D(0)) = (2, 0, 0, 0, 0). \quad (14)$$

Substitute parameters  $\kappa(1), \alpha(1), \theta_1(1)$  and  $\theta_2(1)$  listed in Table 1 into system (1). Using a minimization error square criterion:

$$\delta = \min_{k_{ij} \in [0,1] \in [0,1]} \sqrt{(I(3) - 22)^2 + (I_r(3) - 0)^2 + (D(3) - 0)^2} \quad (15)$$

determines  $k'_{ij}$ 's.

A group  $(\beta_{11}, \beta_{12}, \beta_{21}, \beta_{22})$  that makes  $\delta$  be “smallest” (considering continued simulations) are

$$(\beta_{11}, \beta_{12}, \beta_{21}, \beta_{22}) = (0.75454, 0.48757, 0.11989, 0.07993). \quad (16)$$

The first 4 days' simulations of system (1) with the above equation parameters are shown in Figs. 3(a) and 3(b). The simulation results are in good agreement with the reported clinical data (see the solid and dash lines and legends in Figs. 2(a) and (b)).

Third it needs to determine:  $\theta_1(i), \theta_2(i), i = 2, 3, \dots, 8$ . Denote

$$t_2 = 3, t_3 = 12, t_4 = 24, t_5 = 36, t_6 = 52, t_7 = 73, t_8 = 97.$$

Let  $I_c(t_i)$  to be the number of the reported current symptomatic infected individuals at  $t_i$  in the first Beijing CONVID-19. Let  $I_{cr}(t_i)$  and  $D_c(t_i)$  to be the numbers of the reported cumulative recovered infected and died individuals at  $t_i$ , respectively.

Using the minimization error square criterion:

$$\delta = \min_{\theta_1(i), \theta_2(i) \in [0,1]} \sqrt{(I(t_i) - I_c(t_i))^2 + (I_r(t_i) - I_{cr}(t_i))^2 + (D(t_i) - D_c(t_i))^2} \quad (17)$$

determines the  $\theta_1(i)$ 's and  $\theta_2(i)$ 's. The calculated results are shown in Table 1. The corresponding simulation results of system (1) are shown in Figs. 3(a) and 3(b). Observe that the simulation results of SARDDE model (1) describe well the dynamics of the first COVID-19 epidemic in Beijing.

## Discussions.

(1) On day 0, day 3, and day 140, the numbers of the reported and simulated current symptomatic individuals are approximate the same. On day 12, day 36, day 75 and day 97, there are only one or two differences. On day 24 and day 52, there are 3 and 5 differences.

(2) On day 0, day 3, day 12 and day 140, the numbers of the reported and simulated current symptomatic individuals are approximate the same. On day 52 and day 97, there are 2 and 3 differences, respectively. On day 24, day 36 and day 73, there are 5 ~ 7 differences, respectively.

(3) On day 0, day 3, day 12, day 24, day 36, day 52, day 73, day 97 and day 140, the numbers of the reported and simulated cumulative died individuals are approximate the same.

(4) There is no information on the current symptomatic infected and recovered symptomatic infected individuals. But it has reported that after the 73 day, April 1, there is no symptomatic infected individuals until day 143, June 11 [11]. Our simulation results shows that on the day 73, the number of the simulated current symptomatic infected individuals was less than one ( $\approx 0.7$ ), which seems to explain the actual report data. [11].

(5) Computed results (see (16)) of the transmission rates  $\beta'_{ij}$ 's show that the ratio of the transmission rates of asymptomatic and symptomatic individuals infecting susceptible population to become symptomatic individuals is about 0.159 ( $\beta_{21}:\beta_{11}$ ). It suggests that asymptomatic individuals cause lesser symptomatic spread than symptomatic individuals do.



**Table 2** The criterions of the asymptotical stability and disease spreading of the disease-free equilibrium of SARDDE at eight time intervals.

| $i$ | Day | $\theta_1(i)$ | $\theta_2(i)$ | $a_{11} + a_{22}$ | $a_{12}a_{21} - a_{11}a_{22}$ | $S_p^1$   | $S_p^2$ |
|-----|-----|---------------|---------------|-------------------|-------------------------------|-----------|---------|
| 1   | 0   | 1             | 1             | 0.69161           | 0.10594                       | $\infty$  | 7.1535  |
| 2   | 4   | 0.2855        | 0.052         | 0.066964          | 0.029394                      | 0.4695    | 1.9691  |
| 3   | 13  | 0.1035        | 0.01          | -0.086517         | 0.0079505                     | 0.028822  | 1.1134  |
| 4   | 25  | 0.0191        | 0.01          | -0.18146          | -0.0055869                    | 0.0032844 | 0.80667 |
| 5   | 37  | 0.0118        | 0.01          | -0.20336          | -0.0087015                    | 0.0029741 | 0.62098 |
| 6   | 53  | 0.017         | 0.01          | -0.24559          | -0.014698                     | 0.015805  | 0.36595 |
| 7   | 74  | 0             | 0             | -0.21748          | -0.010661                     | 0         | 0       |
| 8   | 98  | 0             | 0             | -0.179            | -0.0051636                    | 0         | 0       |

(6) The computed results (see (16)) also show that the ratios of the transmission rates of asymptomatic and symptomatic individuals infecting susceptible population to become asymptomatic and symptomatic individuals are about 0.646 ( $\beta_{12}:\beta_{11}$ ) and 0.667 ( $\beta_{22}:\beta_{21}$ ), respectively. It suggests that both symptomatic and asymptomatic individuals cause lesser asymptomatic spreads than symptomatic spreads.

(7) The criteria (7) and (8) of the asymptotical stability of the disease-free equilibrium of SARDDE model (1) over 8-time intervals are shown in the 5th ~ 8th columns of Table 2. It is shown that until the blocking rates ( $1 - \theta_1, 1 - \theta_2$ ) reach to (98.09%, 99%), the disease-free equilibrium becomes globally asymptotical stability. The conditions (9) and (10) of disease spreading are listed in the last two columns in Table 2. It shows also that until the blocking rates ( $\theta_1, \theta_2$ ) reach to (98.09%, 99%), the spreading of COVID-19 epidemic can be blocked .

Now assume that after day 24th, February 12, it still keeps the blocking rates ( $1 - \theta_1(3), 1 - \theta_2(3)$ )  $\approx$  (89.65%, 99%) , the cure rates ( $\kappa(3), \kappa_a(3)$ ), and the died rate  $\alpha(3)$  until the day 140, June 8. The simulation results of SARDDE are shown in Figs 4(a) and 4(b). Observe that the numbers of the current symptomatic and asymptomatic infected individuals reach to about 1.899e5 and 4679, respectively. The numbers of cumulative recovered symptomatic and died individuals reach to about 74278 and 2359, respectively.

Furthermore assume that after the day 52, March 11, it still keeps the blocking rates ( $1 - \theta_1(5), 1 - \theta_2(5)$ )  $\approx$  (98.3%, 99%), the cure rates ( $\kappa(5), \kappa_a(5)$ ), and the died rate  $\alpha(5)$  until the day 140th, June 8. The simulation results of SARDDE are shown in Figs 5(a) and 5(b). Observe that the numbers of the current symptomatic and asymptomatic infected individuals are both less than one, respectively; The numbers of cumulative recovered symptomatic and died individuals are about 411 and 11, respectively. The results suggest that using the data before the day 52h (about 17 days after the turning point) can approximately estimate the following outcome of the the first COVID-19 epidemic in Beijing.

In summary, SARDDE model (1) can simulate the outcomes of the first COVID-19 epidemic in Beijing. The calculated equation parameters can help us to understand and explain the mechanism of epidemic diseases and control strategies for the event of the practical epidemic.

### 3.2 Simulation and prediction of the second COVID-19 epidemic in Beijing

A total of 335 locally symptomatic cases and 50 locally asymptomatic cases were reported during the 2th wave COVID-19 epidemics. After 56 days, all symptomatic and asymptomatic patients were cured. The medical personnel has realized the zero infection. This event of Xinfadi COVID-19 epidemic provides a valuable example of accurate preventing and controlling strategies and excellent clinical treatments.



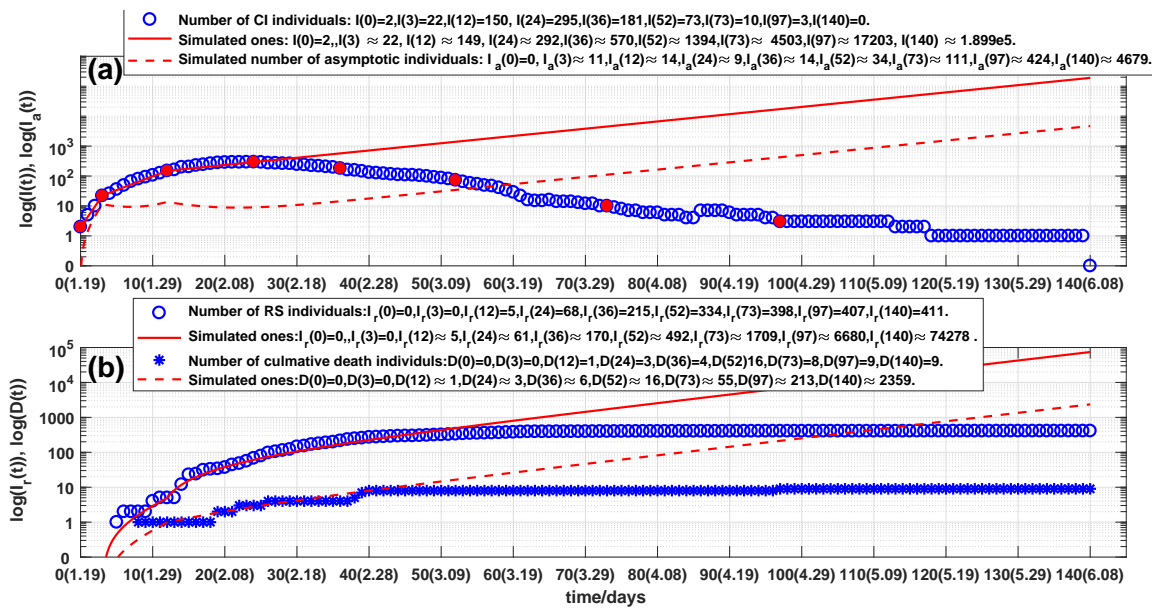

Figure 4: Virtual simulations: (a) Outcome of the number of current symptomatic individuals, representing by circles. Solid line and dash line are outcomes of stimulated current symptomatic and asymptomatic individuals of system (1). (b) Outcomes of the numbers of cumulative recovered symptomatic and died individuals, representing by circles and stars, respectively. Solid line and dash line are corresponding simulations of system (1).

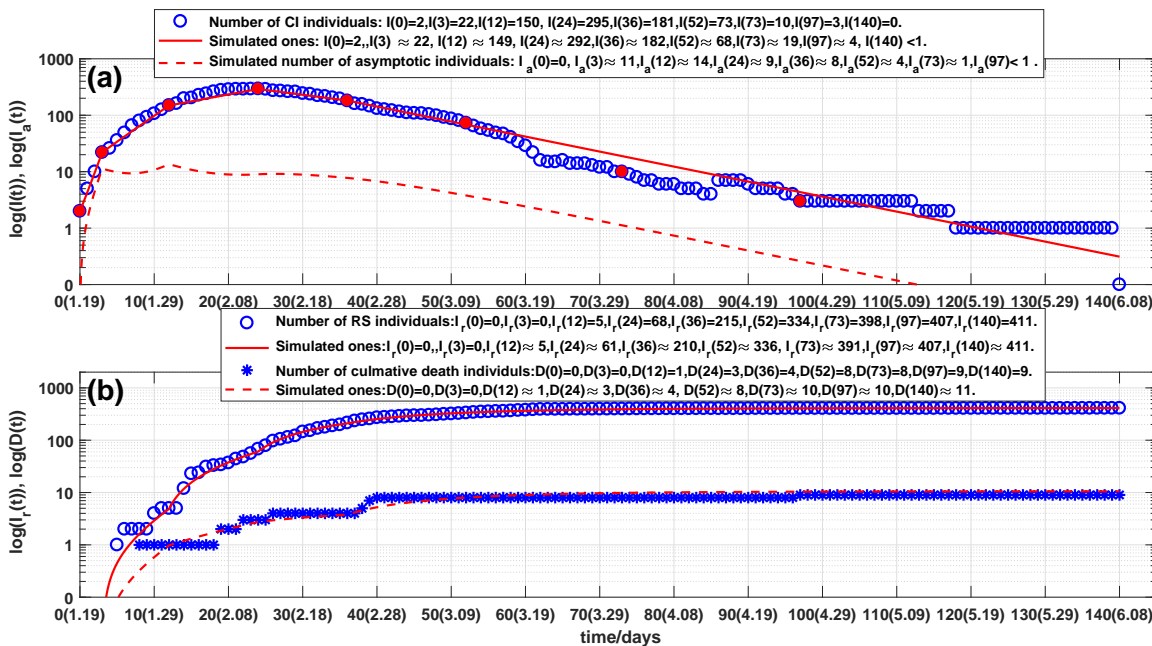

Figure 5: Virtual simulations: (a) Outcome of the number of current symptomatic individuals, representing by circles. Solid line and dash line are outcomes of stimulated current symptomatic asymptomatic individuals of system (1). (b) Outcomes of the numbers of cumulative recovered symptomatic and died individuals, representing by circles and stars, respectively. Solid line and dash line are corresponding simulations of system (1).

### 3.2.1 Model

Similar to Section 2.1 the transition among these states is governed by the following rules (Flowchart of the rules is shown in Fig.6, where  $S$  represents susceptible population.)

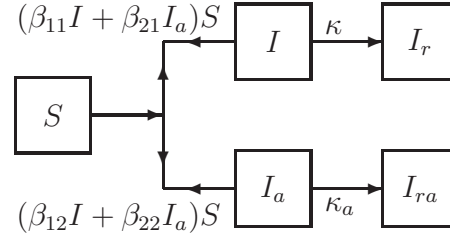

Figure 6: Flowchart of disease transmission among susceptible population  $S$ , current symptomatic infected individuals  $I$ , current asymptomatic but infected individuals  $I_a$  recovered symptomatic infected individuals  $I_r$ , recovered asymptomatic but infected individuals  $I_{ra}$ .

Similar to Section 2.1, assume that the dynamics of an epidemic can be described by  $m$  time intervals. At  $i$ th interval, the model has the form:

$$\frac{dI}{dt} = \theta_1(i)(\beta_{11}I + \beta_{21}I_a)S - \kappa(i)I \quad (18a)$$

$$\frac{dI_a}{dt} = \theta_2(i)(\beta_{12}I + \beta_{22}I_a)S - \kappa_a(i)I_a \quad (18b)$$

$$\frac{dI_r}{dt} = \kappa(i)I \quad (18c)$$

$$\frac{dI_{ra}}{dt} = \kappa_a(i)I_a \quad (18d)$$

Then system (18) has a disease-free equilibrium:

$$E = (0, 0, 0, 0, 0). \quad (19)$$

### 3.2.2 Stability of disease-free equilibrium

The stability of system (18) is determined by the first two equations (18a) and (18b). Denote in (18a) and (18b):

$$a_{11} = \theta_1(i)\beta_{11}S - \kappa(i), \quad (20)$$

$$, \quad a_{12} = \theta_1(i)\beta_{21}S, \quad (21)$$

$$a_{21} = \theta_2(i)\beta_{12}S, \quad (22)$$

$$a_{22} = \theta_2(i)\beta_{22}S - \kappa_a(i). \quad (23)$$

Then at the disease-free equilibrium of system(18), the Jacobian matrix of (18a) and (18b) has the form

$$J = \begin{bmatrix} a_{11} & a_{12} \\ a_{21} & a_{22} \end{bmatrix}.$$

Solving the corresponding eigenequation obtains 2 eigenvalues:

$$x_{1,2} = \frac{1}{2} \left( a_{11} + a_{22} \pm \sqrt{(a_{11} + a_{22})^2 + 4(a_{12}a_{21} - a_{11}a_{22})} \right).$$

Therefore it obtains the following:

**Theorem 3** Suppose that  $a_{11}, a_{12}, a_{21}$  and  $a_{22}$  are defined by (20)-(23). Then the disease-free equilibrium  $E$  of system (18) is globally asymptotically stable if, and only if, the following inequalities hold:

$$(a) \quad R_{local}^1 \triangleq a_{11} + a_{12} < 0, \tag{24}$$

$$(b) \quad R_{local}^2 \triangleq a_{12}a_{21} - a_{11}a_{22} < 0. \tag{25}$$

### 3.2.3 The necessary condition of disease spreading

If an epidemic can occur, then

$$\dot{I}(t)|_{t=0} > 0, \quad \dot{I}_a(t)|_{t=0} > 0.$$

This implies that

$$\begin{aligned} \theta_1(i)(\beta_{11} + \beta_{21}I_a(t)/I(t))S - \kappa(i) &> 0 \\ \theta_2(i)(\beta_{12}I(t)/I_a(t) + \beta_{22})S - \kappa_a(i) &> 0. \end{aligned}$$

Solving the above inequalities gives the following

**Theorem 4** If system (18) satisfies the following inequalities

$$(a) \quad S_p^1 \triangleq \theta_1(i)(\beta_{11} + \beta_{21}I_a(t)/I(t))S/\kappa(i) > 1 \tag{26}$$

$$(b) \quad S_p^2 \triangleq \theta_2(i)(\beta_{12}I(t)/I_a(t) + \beta_{22})S/\kappa_a(i) > 1. \tag{27}$$

Then a disease transmission will occur.

### 3.2.4 Simulations

Until June 10, 2020, the Beijing whole city continual 56 days has no new reports of the locally confirmed COVID-19 cases. There have been 11 districts in all 15 districts which continually have no reported locally COVID-19 case over 100 days. However in June 11, Xinfadi in Tongzou district appeared a COVID-19 confirmed case. Thus has caused the second wave COVID-19 epidemic in Beijing.

Based on the reported clinical COVID-19 epidemic data from June 11 to August 6, 2020 in Beijing [11], this Section will discuss the applications of above theoretical results.

Figure 7(a) show that the reported data on current confirmed symptomatic infection cases [11]. Figure 7(b) show that the reported data on cumulative recovered symptomatic infection cases [11]. Figure 8(a) show that the reported data on current confirmed asymptomatic infection cases [11]. Figure 8(b) show that the reported data on cumulative recovered asymptomatic infection cases [11].

The evolution of the current symptomatic infected individuals, and the current asymptomatic infected individuals are shown in Fig. 9(a) by circles and diamonds, respectively. The evolution of cumulative recovered symptomatic infected individuals, and cumulative recovered asymptomatic infected individuals are shown in Fig. 9(b) by circles and diamonds, respectively.

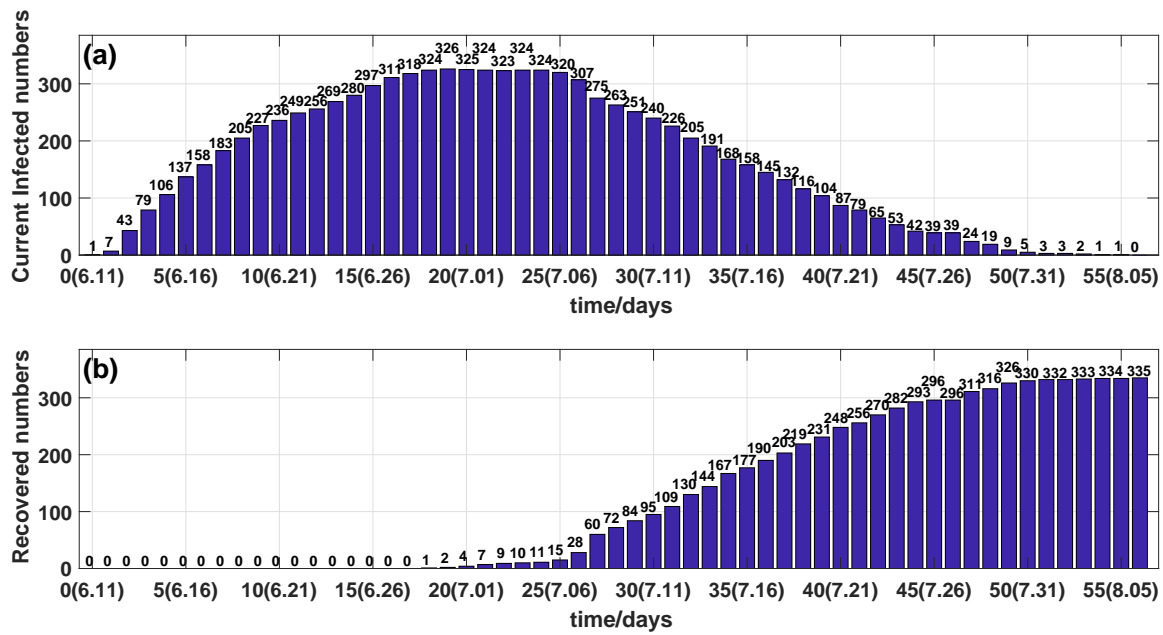

Figure 7: (a) Outcome of the number of current symptomatic infected individuals. (b) Outcome of the number of cumulative recovered symptomatic infected individuals.

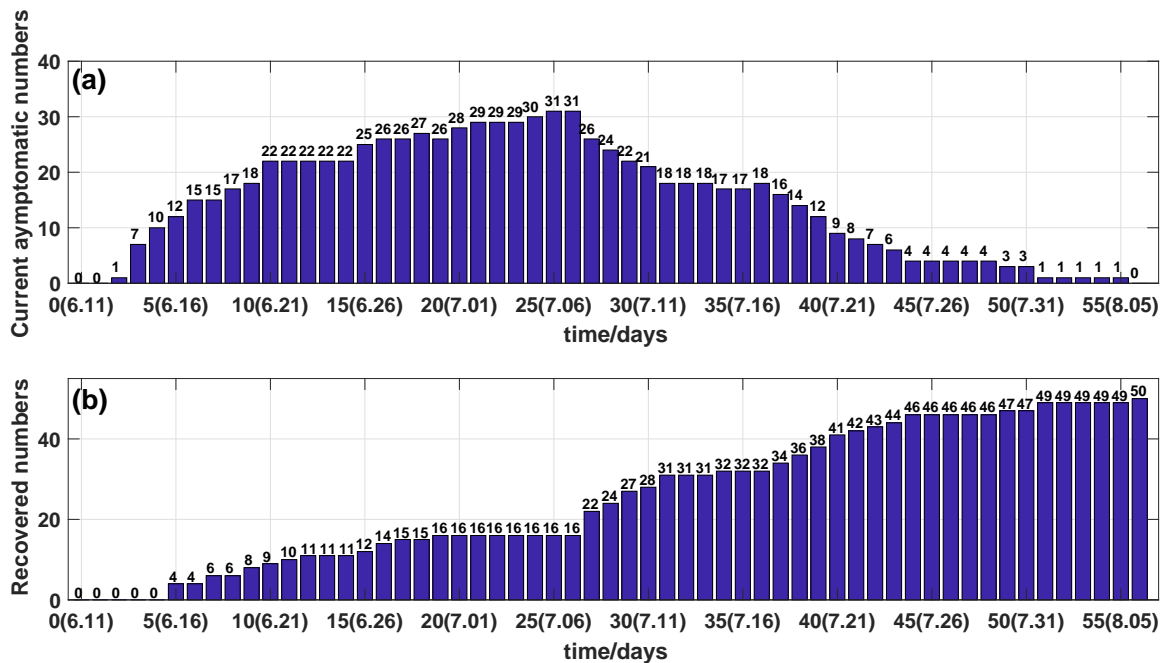

Figure 8: (a) Outcome of the number of current asymptomatic infected individuals. (b) Outcome of the number of cumulative recovered asymptomatic infected individuals.

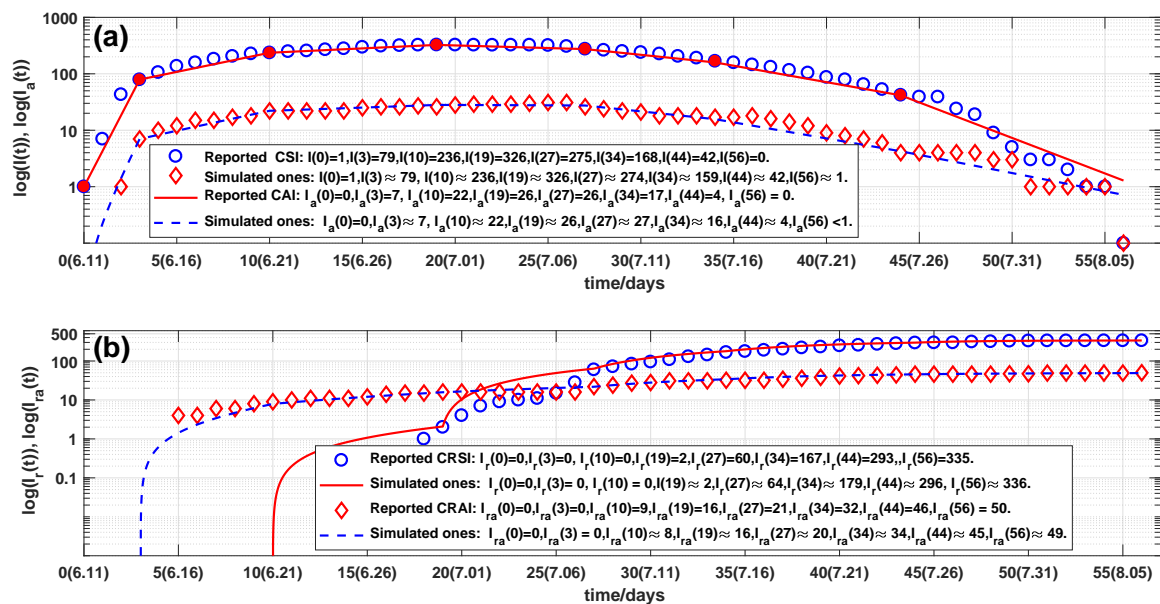

Figure 9: Outcomes of the numbers of: (a) current symptomatic individuals (CSI) and current asymptomatic individuals (CAI), representing by circles and diamonds. Solid line and dash line are the corresponding stimulated ones of system (18). Outcomes of the numbers of: (b) cumulative recovered symptomatic individuals (CRSI) and cumulative recovered asymptomatic individuals (CRAI), representing by circles and diamonds, respectively. Solid line and dash line are corresponding simulations of system (18).

Observe from Fig.9 that the overall changes in the number of current confirmed infections are not subject to the law of exponential changes, but the data can be approximated in good agreement with 7 straight lines in log scale (see Fig.9). This phenomenon can be explained as different medical measures and prevention and control strategies have been adopted over different 8-time intervals. Therefore the  $i$  in SARDDE model (18) satisfies

$$i = 1, 2, \dots, 7.$$

Based on the reported clinical COVID-19 epidemic data from June 11 to August 6, 2020 in Beijing [11], this Section will discuss the applications of above theoretical results. The numbers of current symptomatic infected individuals, and current asymptomatic but infected individuals are showed in Fig. 9(a) by circles and diamonds, respectively. The numbers of current recovered symptomatic infected individuals, and current recovered asymptomatic but infected individuals are showed in Fig. 9(b) by circles and diamonds, respectively.

The number of current infected individuals was risen rapidly in the first 4 days (see Fig. 9(a)). The number of current infected individuals reached the highest 326 on the day 19th, June 30 (see Fig. 9(a)), and then after the day 27th, July 7, declined rapidly. The corresponding cumulative number of recovered symptomatic and asymptomatic individuals has risen rapidly after the day 27th, July 7 (see Fig. 9(b)). Observe from the Figs. 9(a) and 9(b) that the overall changes in the number of current firmed infections are not subject to the law of exponential changes, but the data can be approximated in good agreement with 7 straight lines in log scale (see Fig. 9). This phenomenon can be explained as: different medical measures and prevention and control strategies have been adopted at the different 7 time intervals. Therefore the  $i$  in model (18) satisfies

$$i = 1, 2, \dots, 7.$$

**Table 3** The data of the second wave COVID-19 epidemics on 7 different days and corresponding calculated parameters of SARDDE model (18). Where NCSII and NCAII represent the numbers of the current symptomatic infected individuals and the current asymptomatic infected individuals, respectively; NRSII and NRAII represent the numbers of the cumulative recovered symptomatic infected individuals and the asymptomatic infected individuals over the  $i$ th interval.

| $i$      | Day | Date | NCSII | NCAII | NRSII | NRAII | $\kappa(i)$ | $\kappa_a(i)$ | $\theta_1(i)$ | $\theta_2(i)$ |
|----------|-----|------|-------|-------|-------|-------|-------------|---------------|---------------|---------------|
| <b>1</b> | 0   | 6.11 | 1     | 0     |       |       | 0           | 0             | 1             | 1             |
|          | 3   | 6.14 | 79    | 7     | 0     | 0     | 0           | 0             | 1             | 1             |
| <b>2</b> | 4   | 6.15 | 106   | 10    | 0     | 9     | 0           | 0.085714      | 0.1069        | 0.164         |
|          | 10  | 6.21 | 236   | 22    |       |       |             |               |               |               |
| <b>3</b> | 11  | 6.22 | 249   | 22    | 2     | 7     | 8.3056e-4   | 0.035         | 0.0249        | 0.04          |
|          | 19  | 6.30 | 326   | 26    |       |       |             |               |               |               |
| <b>4</b> | 20  | 7.01 | 325   | 28    | 58    | 6     | 0.025732    | 0.027149      | 0.003         | 0.016         |
|          | 27  | 7.08 | 275   | 26    |       |       |             |               |               |               |
| <b>5</b> | 28  | 7.09 | 263   | 24    | 107   | 10    | 0.077762    | 0.082645      | 0             | 0.002         |
|          | 34  | 7.15 | 168   | 17    |       |       |             |               |               |               |
| <b>6</b> | 35  | 7.16 | 158   | 17    | 126   | 14    | 0.13419     | 0.13084       | 0             | 0             |
|          | 44  | 7.25 | 42    | 4     |       |       |             |               |               |               |
| <b>7</b> | 45  | 7.26 | 39    | 4     | 42    | 4     | 0.28966     | 0.14815       | 0             | 0             |
|          | 56  | 8.06 | 0     | 0     |       |       |             |               |               |               |

First it needs to determine the parameters  $\kappa(i), \kappa_a(i)$ . Denote  $s_1(i)$  and  $s_2(i)$  to be the days that the old patients and the new patients stayed in the hospital during  $i$ th time interval. Denote  $R(i)$  and  $R_a(i)$  to be the numbers of the recovered symptomatic patients and asymptomatic patients during  $i$ th time interval, respectively. Then  $\kappa(i)$  and  $\kappa_a(i)$  can be defined by

$$\kappa(i) = \frac{R(i)}{s_1(i) + s_2(i)} \quad (28)$$

$$\kappa_a(i) = \frac{R_a(i)}{s_1(i) + s_2(i)} \quad (29)$$

The calculated  $\kappa(i)$ 's and  $\kappa_a(i)$ 's are shown in Table 3.

Second it needs to determine the parameters  $\beta'_{ij}$ 's in system (18). One can assume that  $S = 1$  because the effects of S can be deleted by calculated  $\beta'_{ij}$ 's. This makes the calculated  $\beta'_{ij}$ 's have general sense. Using the practical data of Xinfadi COVID-19 epidemic (see the second line in Table 3) selects following initial condition

$$(I(0), I_a(0), I_r(0), I_{ra}(0)) = (1, 0, 0, 0). \quad (30)$$

Substitute parameters  $\kappa(1), \kappa_a(1), \theta_1(1)$  and  $\theta_2(1)$  listed in Table 3 into system (18). Using a minimization error square criterion:

$$\delta = \min_{\beta_{ij} \in [0, 1.5]} \sqrt{(I(3) - 79)^2 + (I_a(3) - 7)^2} \quad (31)$$

determines  $\beta'_{ij}$ 's. A group  $\beta'_{ij}$ 's that makes  $\delta$  be "smallest" (considering continued simulations) are

$$(\beta_{11}, \beta_{12}, \beta_{21}, \beta_{22}) = (1.4492, 0.072824, 0.13108, 0.72824). \quad (32)$$



The simulations of system (18) with above equation parameters are shown in Figs. 9(a) and 9(b). Observe that the simulation results are in good agreement with the reported first 4 days' clinical data (see the solid and dash lines in Figs. 9(a) and 9(b)).

Third it needs to determine:  $\theta_1(i), \theta_2(i), i = 2, 3, \dots, 7$ . Denote

$$t_1 = 10, t_2 = 19, t_3 = 27, t_4 = 34, t_5 = 44, t_6 = 56.$$

Let  $I_c(t_i)$  and  $I_{ca}(t_i)$  to be the numbers of the current symptomatic and asymptomatic infected individuals at time  $t_i$ , respectively;  $I_{cr}(t_i)$  and  $I_{cra}(t_i)$  to be the numbers of the cumulative recovered symptomatic and asymptomatic infected individuals at time  $t_i$ , respectively.

Using the minimization error square criterion:

$$\delta = \min_{\theta_1(i), \theta_2(i) \in [0,1]} \sqrt{(I(t_i) - I_c(t_i))^2 + (I_a(t_i) - I_{ca}(t_i))^2 + (I_r(t_i) - I_{cr}(t_i))^2 + (I_{ra}(t_i) - I_{cra}(t_i))^2} \quad (33)$$

determines the  $\theta_1(i)$  and  $\theta_2(i)$ . The calculated results are shown in Table 3. The corresponding simulation results of system (18) are shown in Fig. 9(a) and 9(b). Observe that the simulation results of model (18) describe well the dynamics of the second COVID-19 epidemic in Beijing.

### Discussions

(1) On day 0, day 3, day 19, day 27, and day 56, the numbers of the reported and simulated current symptomatic individuals are approximate the same. On day 27 and day 56, they have only one difference. On day 34, they have 9 differences.

(2) On the day 0, day 3, day 10, day 19, day 44 and day 56, the numbers of the practical and simulated current asymptomatic individuals are approximate the same. On the day 27 and day 34, they have only one difference.

(3) On 0 day, 3, 10 and 19, the numbers of practical and simulated cumulative recovered symptomatic individuals are approximate the same, respectively. On the day 27, it has 4 differences. On the day 34, it has 12 differences. On the day 44, it has 3 differences. On the day 56, it has only one difference.

(4) On the day 0, day 3, and day 19, the numbers of practical and simulated cumulative recovered asymptomatic individuals are approximate the same. On day 10, day 27, day 44 and day 56, they have only one difference. On day 34, it has one two differences.

(5) Computed results (see (32)) show that the ratio of the transmission rates of asymptomatic and symptomatic individuals infecting susceptible population to become symptomatic individuals is about 9% ( $\beta_{21} : \beta_{11}$ ). It suggests that asymptomatic individuals cause lesser symptomatic spread than symptomatic individuals do.

(6) Computed results (see (32)) also show that the ratios of the transmission rates of asymptomatic and symptomatic individuals infecting susceptible population to become asymptomatic and symptomatic individuals are about 5% ( $\beta_{12} : \beta_{11}$ ) It suggests that symptomatic individuals cause lesser asymptomatic spread than symptomatic spread.

(7) The criteria of the stability of the disease-free equilibrium of system (18) at 7-time intervals are listed in Table 4. It shows that until the blocking rates  $(1 - \theta_1, 1 - \theta_2)$  reach to ( 99.869%, 98.69%), the disease-free equilibrium becomes globally asymptotical stable. The blocking rates (97.46%, 96.94%) cannot prevent the spread of the second COVID-19 epidemic in Beijing.

**Table 4** The criterions of the asymptotical stability and disease spreading of the disease-free equilibrium of system (18) at 7 time intervals.

| $i$ | Day | $\theta_1(i)$ | $\theta_2(i)$ | $a_{11} + a_{22}$ | $a_{12}a_{21} - a_{11}a_{22}$ | $S_p^1$    | $S_p^2$   |
|-----|-----|---------------|---------------|-------------------|-------------------------------|------------|-----------|
| 1   | 3   | 1             | 1             | 1.5803            | -1.0458                       | $+\infty$  | $+\infty$ |
| 2   | 10  | 0.107         | 0.151         | 0.16909           | -0.0036061                    | $+\infty$  | 2.6523    |
| 3   | 19  | 0.0254        | 0.0306        | 0.039309          | 0.00046492                    | 0.46118    | 1.4215    |
| 4   | 27  | 0.00131       | 0.0131        | -0.023662         | -0.00041952                   | 0.00093717 | 0.70243   |
| 5   | 34  | 0             | 0.003         | -0.077762         | -0.0062568                    | 0          | 0.053208  |
| 6   | 44  | 0             | 0             | -0.13419          | -0.017557                     | 0          | 0         |
| 7   | 56  | 0             | 0             | -0.28966          | -0.042913                     | 0          | 0         |

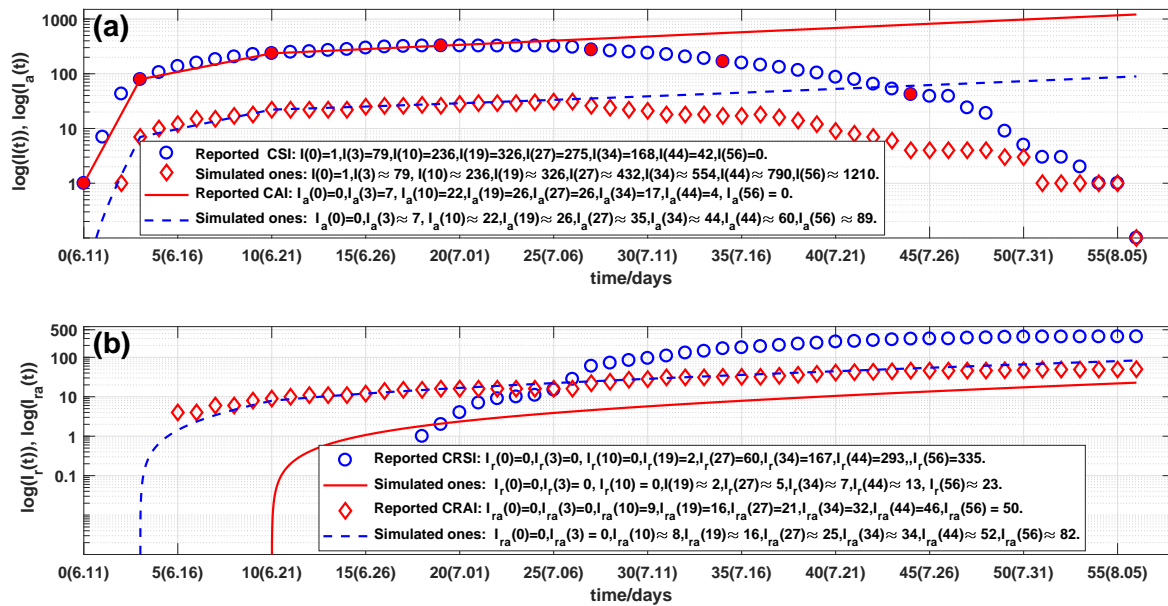

Figure 10: Virtual simulations. Outcomes of the numbers of: (a) current symptomatic individuals (CSI) and current asymptomatic individuals (CAI), representing by circles and diamonds. Solid line and dash line are the corresponding stimulated ones of system (18). Outcomes of the numbers of: (b) cumulative recovered symptomatic individuals (CRSI) and cumulative recovered asymptomatic individuals (CRAI), representing by circles and diamonds, respectively. Solid line and dash line are corresponding simulations of system (18).

Now assume that it keeps still the blocking rates  $(1 - \theta_1(3), 1 - \theta_2(3)) \approx (97.46\%, 96.94\%)$  and the cure rates  $(\kappa(3), \kappa_a(3))$  until the day 56, August 6. The simulation results of system (18) are shown in Fig.10. Observe that on the day 56, the numbers of the current symptomatic and asymptomatic infected individuals reach to 1210 and 89, respectively; The numbers of cumulative recovered symptomatic and asymptomatic infected individuals reach to 23 and 82, respectively.

Furthermore assume that after the day 34th, July 14, it still keeps the blocking rates  $(1 - \theta_1(5), 1 - \theta_2(5))$ , the cure rates  $(\kappa(5), \kappa_a(5))$  until the day 56th, August 6. The simulation results of system (18) are shown in Figs. 11(a) and 11(b). Observe that on the day 56, the numbers of the current symptomatic and asymptomatic infected individuals are about 29 and 2, respectively. The numbers of cumulative recovered symptomatic and

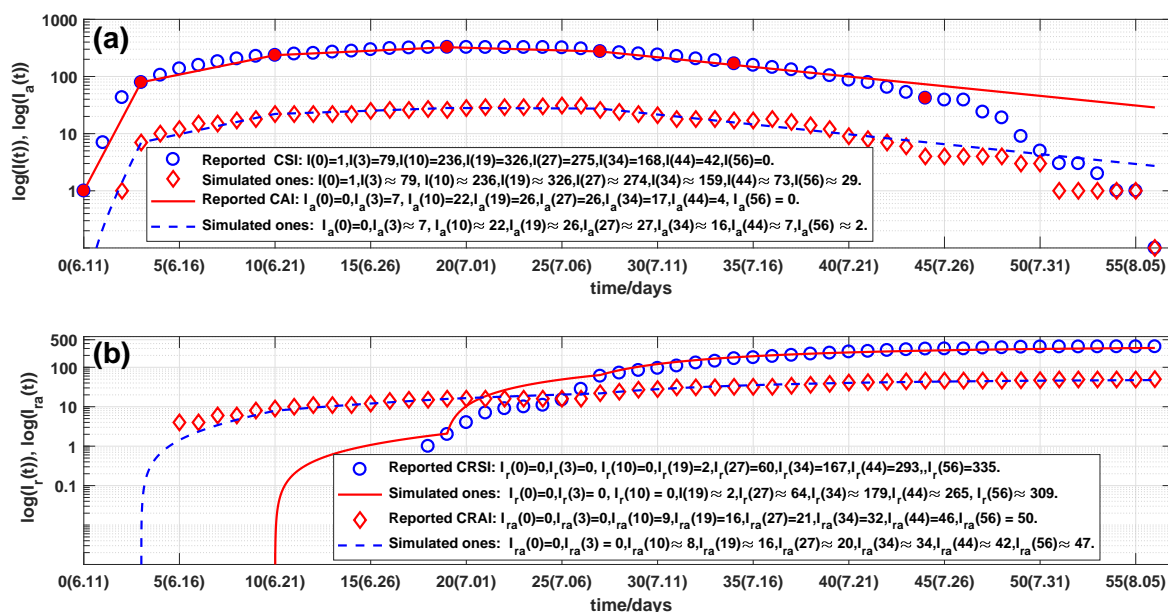

Figure 11: Virtual simulations. Outcomes of the numbers of: (a) current symptomatic individuals (CSI) and current asymptomatic individuals (CAI), representing by circles and diamonds. Solid line and dash line are the corresponding stimulated ones of system (18). Outcomes of the numbers of: (b) cumulative recovered symptomatic individuals (CRSI) and cumulative recovered asymptomatic individuals (CRAI), representing by circles and diamonds, respectively. Solid line and dash line are corresponding simulations of system (18).

asymptomatic individuals are about 309 and 47, respectively. The results suggest that using the data before the day 34 (about two weeks after the turning point) can approximately to estimate the following outcome of the the second COVID-19 academic in Beijing.

## 4 Conclusions

The main contributions of this paper are summarized as follows:

- (1) Proposed the SARDDE models ((1) and (18)) with 4 or 5 states: current symptomatic and asymptomatic infected individuals, cumulative recovered symptomatic and asymptomatic infected individuals, died individuals.
- (2) Provided the criterion inequalities for the asymptotical stability of the disease free equilibrium point of SARDDE (see Theorem 1 and Theorem 3).
- (3) Given the criterion inequalities for epidemic transmission (see Theorem 2 and Theorem 4) of the symptomatic and asymptomatic infections.
- (4) Using the reported clinic data and the model simulations results are depicted for biologically significant model parameters.
- (5) In systems (1) and (18), assume, respectively, that after the day 24th and the day 19th if still keeps the blocking rates  $(\theta_1(3), \theta_2(3))$ , the cure rates  $(\kappa(3), \kappa_a(3))$  and the died rate  $\alpha(3)$  until the day 140th, June 8 and the day 56, August 6. Virtual simulations of systems (1) and (18) suggest that even the a blocking rate to symptomatic individuals reaches to about 90%/97%, the two COVID-19 epidemics can still spread and reach very height levels (see Figs. 4 and 10). Therefore the strict prevention and control strategies implemented by Beijing government is not only very effective but also completely necessary.
- (6) Simulations showed that using the data form the beginning to the day after about two weeks from the turning points, we can estimate well or approximately the following outcomes of the first or second COVID-19

academics in Beijing.

(7) The selections of the transmission rates  $\beta'_{ij}$ s are difficult because different combinations of  $\beta'_{ij}$ s can produce very closed simulation errors. Agreements of followed simulations are used to judge the reasonableness of the selected  $\beta'_{ij}$ s.

(8) In the case of the first COVID-19 academic in Beijing, The proposed SARDDE is simpler than our previous one [7,8]. The determinations of the SARDDE parameters only used one assumption (13). However it can better describe and explain the practical reported data [11] although the lack of the data of the asymptomatic infected individuals. In the case of the second COVID-19 epidemic in Beijing, the numerical simulations show that the four variables of model (18) describe and explain well the real world data [11]. In both cases, the numerical simulations of the SARDDEs accurately predict the long-terms real world data [11].

Because not all infected people can go to the hospital for treatment and be confirmed at the first time. In some cases: adequate resources, no shortage of beds and medical treatment advantages, patients may be left behind when they are discharged from the hospital. Therefore, it does not have very important practicality, that the simulation results of the model are required accurately describe every datum reported on the epidemic. Long-term accumulated data, such as the total number of patients and the number of deaths may eliminate short-term deviations. Therefore, the accuracy of predicting long-term epidemics should be the standard for evaluating the rationality of the selected model and unknown model parameters. It is expected that the research can provide better understanding, explanation, and dominating the spread and control measures of epidemics.

## Funding

The author declares no potential conflict of interest.

## Conflict of Interest

The author declares no potential conflict of interest.

## Note

The previous versions of the manuscript have been published online [12,13].

## References

- [1] D. J. Daley and J. Gani, *Epidemic Modeling: An Introduction*. New York: Cambridge University Press, 2005.
- [2] Z. Yang, Z. Zeng, K. Wang, and J. Ran, et al., “Modified SEIR and AI prediction of the epidemics trend of covid-19 in China under public health interventions,” *Journal of Thoracic Disease*, vol. 12, no. 3, pp. 165–174, 2020.
- [3] S. Zhao, Q. Linc, and R. Ran, et al., “Preliminary estimation of the basic reproduction number of novel coronavirus (2019-nCoV) in China, from 2019 to 2020: A data-driven analysis in the early phase of the outbreak,” *International Journal of Infectious Diseases*, vol. 92, pp. 214–217, 2020.
- [4] K. Roosa, Y. Lee, and R. Luo, et al., “Real-time forecasts of the COVID-19 epidemic in China from February 5th to February 24th, 2020,” *Infectious Disease Modelling*, vol. 5, pp. 256–263, 2020.
- [5] B. Tang, N. L. Bragaazzi, and Q. Li, et al., “An updated estimation of the risk of transmission of the novel coronavirus (2019-nCov),” *Infectious Disease Modelling*, vol. 5, pp. 248–255, 2020.

- [6] X. J. Li and Z. H. Li, “Study on transmission model of the novel coronavirus (in Chinese),” 2020. Available, <http://www.paper.edu.cn/releasepaper/content/202002-42>(accessed July 3 2021).
- [7] L. Min, “A SIR model including asymptomatic virus carriers with application (in Chinese),” 2020. Available, <http://www.paper.edu.cn/releasepaper/content/202003-25>(accessed July 3 2021).
- [8] —, “Simulations and estimations of COVID-19 epidemics in Beijing and Shanghai,” 2020. Available, <http://www.paper.edu.cn/releasepaper/content/202008-2>(accessed July 3 2021).
- [9] N. Chintalapudiah, G. Battinenia, and G. G. Sagaroa, et al., “COVID-19 outbreak reproduction number estimations and forecasting in Marche, Italy,” *International Journal of Infectious Diseases*, vol. 96, pp. 327–333, 2020.
- [10] J. O. Lloyd-Smith, S. Funk, and A. R. McLEAND, et al., “Nine challenges in modelling the emergence of novel pathogens,” *Epidemics*, no. 10, pp. 35–39, 2015.
- [11] Health Commission of Beijing, “Epidemic bulletin (in Chinese),” 2020-02-19-08-06, <http://wjw.beijing.gov.cn/>.
- [12] L. Min, “Accurate simulations and analysis of Xinfadi COVID-19 epidemics in Beijing,” 2020. Available, <http://www.paper.edu.cn/releasepaper/content/202012-104>(accessed July 3 2021).
- [13] —, “Modelling, simulations and analysis of the first COVID-19 epidemic in Beijing,” 2021. Available, <http://www.paper.edu.cn/releasepaper/content/202102-88>(accessed July 3 2021).
